# Supplementary material
Source: PubMed Central journal article supplement (PMC1941475)

0.31 0.62 1.25 2.5 5 10 20 ng

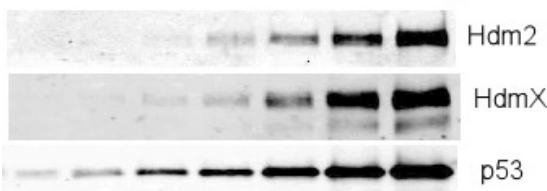**LiCor**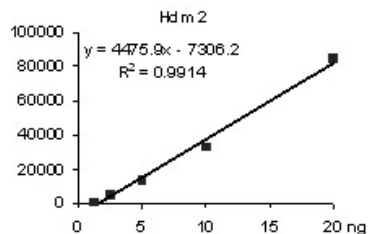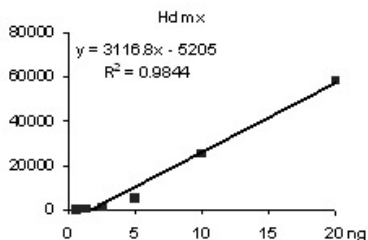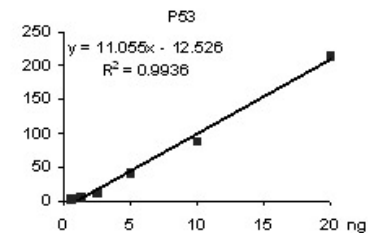

0.31 0.62 1.25 2.5 5 10 20 ng

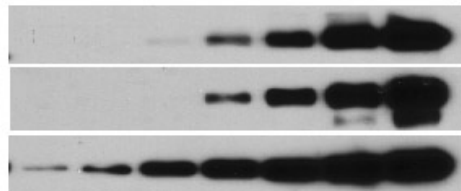**ECL**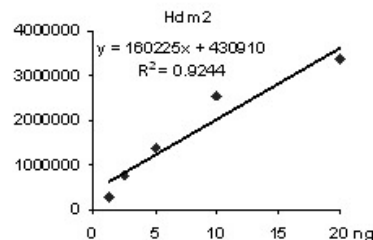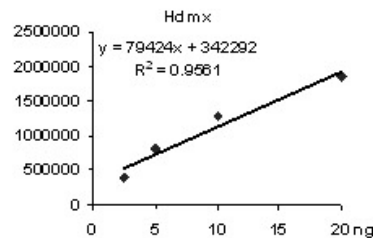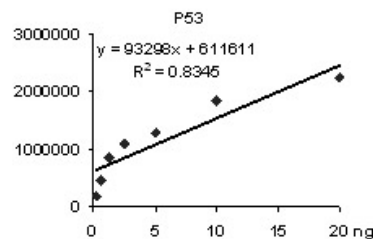

Supplement: pnas_0701497104_1.pdf [file pnas_0701497104_1.pdf]

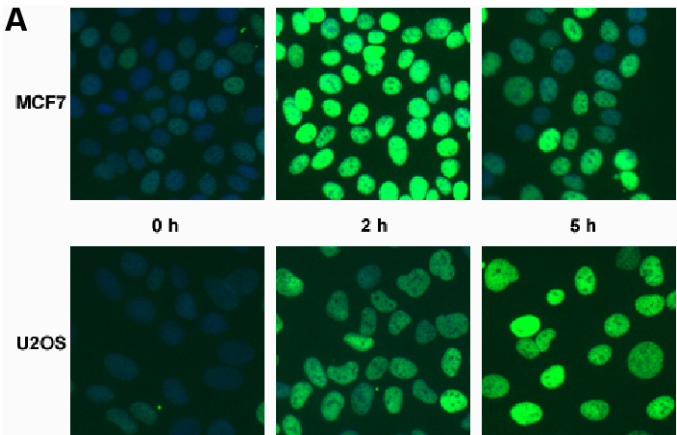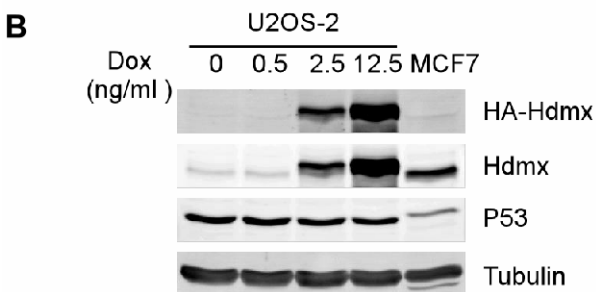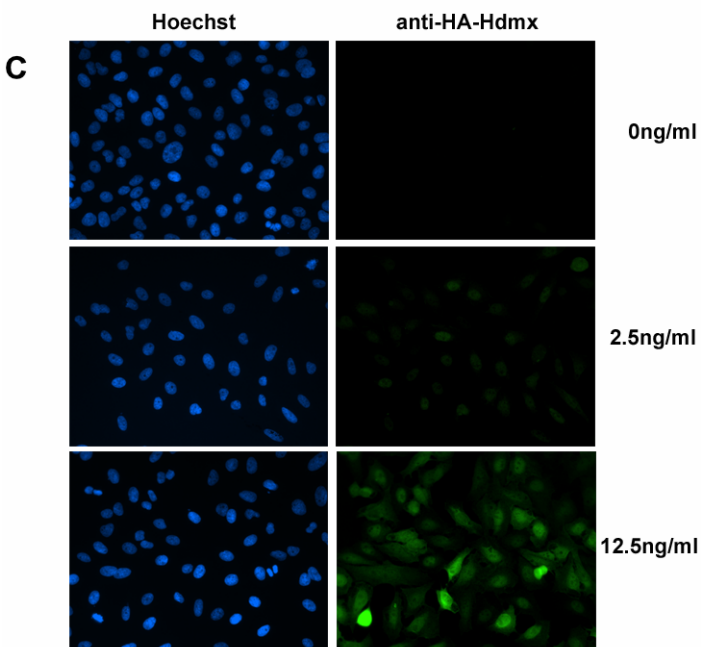

Supplement: pnas_0701497104_2.pdf [file pnas_0701497104_2.pdf]

**A**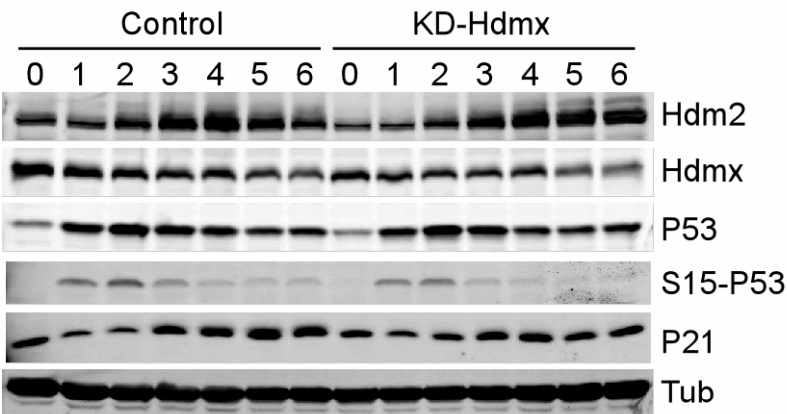**B**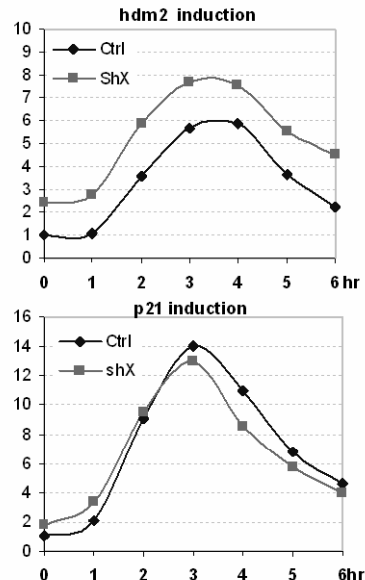**C**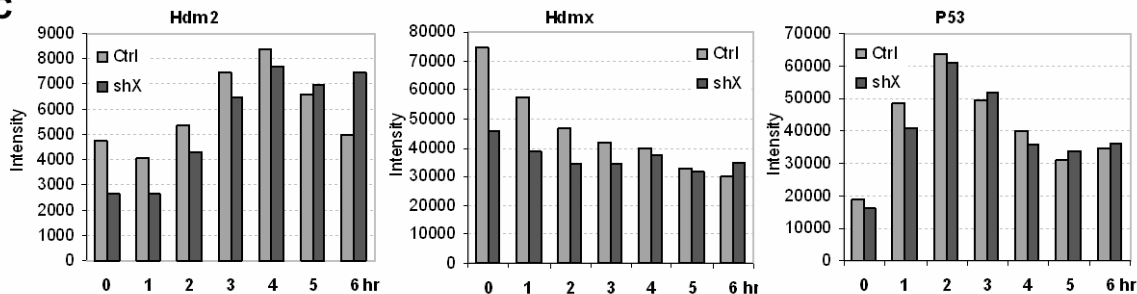

Supplement: pnas_0701497104_3.pdf [file pnas_0701497104_3.pdf]

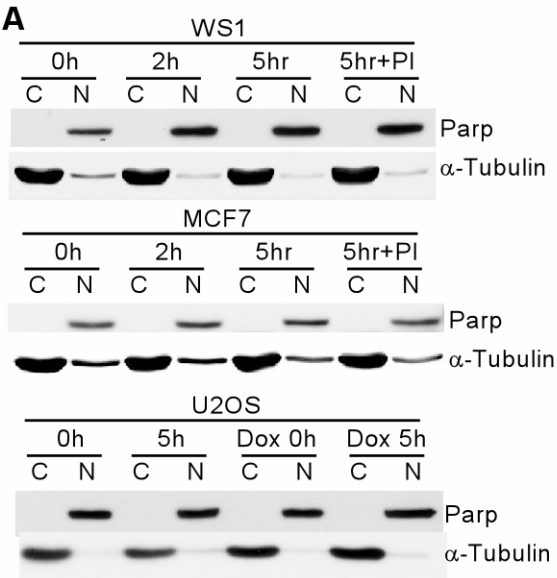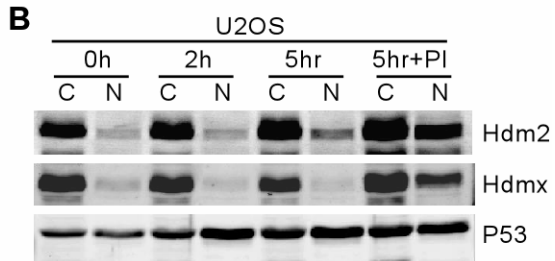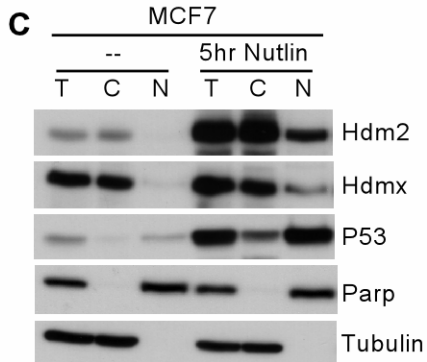

Supplement: pnas_0701497104_4.pdf [file pnas_0701497104_4.pdf]

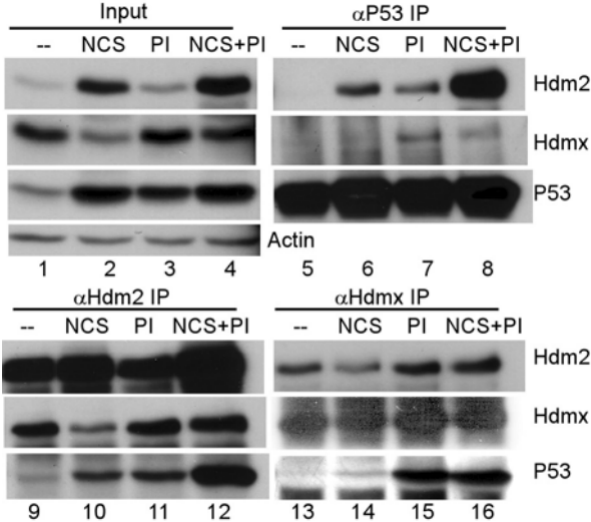

Supplement: pnas_0701497104_5.pdf [file pnas_0701497104_5.pdf]
